# Supplementary material
Source: PubMed Central journal article supplement (PMC4755786)
Supplement: NIHMS754895-supplement-1.pdf [file NIHMS754895-supplement-1.pdf]

**Supplementary table 1. Likelihood (OR, 95% CI) of new radiographic vertebral fracture ( $\Delta$ SQ grade $\geq$ 1) by sex hormone level, among men without a radiographic vertebral fracture at baseline**

|                             | Q1                   | Q2                              | Q3                              | Q4                     |         | Per SD increase   |
|-----------------------------|----------------------|---------------------------------|---------------------------------|------------------------|---------|-------------------|
| <b>SHBG</b>                 | < 35.7<br>nmol/liter | $\geq$ 35.7—<46.5<br>nmol/liter | $\geq$ 46.5—<59.3<br>nmol/liter | $\geq$ 59.3 nmol/liter | p trend | SD=19.78          |
| N with outcome              | 5 (2.1) in 242       | 5 (2.0) in 247                  | 13 (6.0) in 217                 | 13 (6.7) in 194        |         |                   |
| Minimally Adjusted          | 0.45 (0.15, 1.36)    | 0.37 (0.12, 1.07)               | 1.00 (0.44, 2.27)               | 1.0 (ref)              | 0.047   | 1.43 (1.04, 1.97) |
| Multivariate Adjusted       | 0.48 (0.15, 1.49)    | 0.35 (0.12, 1.05)               | 1.03 (0.45, 2.36)               | 1.0 (ref)              | 0.058   | 1.40 (1.00, 1.96) |
| Multivariate Adjusted + BMD | 0.48 (0.15, 1.52)    | 0.37 (0.12, 1.10)               | 1.01 (0.43, 2.34)               | 1.0 (ref)              | 0.071   | 1.35 (0.96, 1.91) |
| <b>E2</b>                   | < 17.2<br>pg/ml      | $\geq$ 17.2—<21.7<br>pg/ml      | $\geq$ 21.7—<26.9<br>pg/ml      | $\geq$ 26.9 pg/ml      |         | SD=7.83           |
| N with outcome              | 8 (3.9) in 203       | 10 (4.1) in 245                 | 9 (4.0) in 224                  | 9 (4.0) in 228         |         |                   |
| Minimally Adjusted          | 1.21 (0.44, 3.28)    | 1.37 (0.53, 3.52)               | 1.12 (0.43, 2.94)               | 1.0 (ref)              | 0.619   | 1.04 (0.75, 1.42) |
| Multivariate Adjusted       | 1.23 (0.45, 3.38)    | 1.46 (0.56, 3.81)               | 1.17 (0.44, 3.11)               | 1.0 (ref)              | 0.579   | 1.01 (0.74, 1.38) |
| Multivariate Adjusted + BMD | 1.12 (0.41, 3.11)    | 1.42 (0.54, 3.73)               | 1.15 (0.43, 3.06)               | 1.0 (ref)              | 0.709   | 1.04 (0.76, 1.42) |
| <b>T</b>                    | < 298.0<br>ng/dl     | $\geq$ 298.0—<388.0<br>ng/dl    | $\geq$ 388.0—<488.0<br>ng/dl    | $\geq$ 488.0<br>ng/dl  |         | SD=160.9          |
| N with outcome              | 9 (4.1) in 218       | 11 (4.7) in 234                 | 8 (3.6) in 224                  | 8 (3.6) in 224         |         |                   |

|                             |                   |                        |                        |                 |       |                   |
|-----------------------------|-------------------|------------------------|------------------------|-----------------|-------|-------------------|
| Minimally Adjusted          | 1.26 (0.47, 3.40) | 1.44 (0.56, 3.72)      | 1.05 (0.38, 2.88)      | 1.0 (ref)       | 0.517 | 0.98 (0.69, 1.39) |
| Multivariate Adjusted       | 1.32 (0.46, 3.76) | 1.47 (0.55, 3.90)      | 1.05 (0.37, 2.94)      | 1.0 (ref)       | 0.478 | 0.96 (0.67, 1.38) |
| Multivariate Adjusted + BMD | 1.40 (0.48, 4.07) | 1.55 (0.58, 4.17)      | 1.07 (0.38, 3.02)      | 1.0 (ref)       | 0.406 | 0.94 (0.65, 1.35) |
| <b>BioE</b>                 | < 11.3<br>pg/ml   | ≥11.3—<14.0<br>pg/ml   | ≥14.0—<17.0<br>pg/ml   | ≥ 17.0 pg/ml    |       | SD=4.79           |
| N with outcome              | 12 (5.9) in 202   | 4 (1.7) in 231         | 10 (4.4) in 227        | 10 (4.2) in 240 |       |                   |
| Minimally Adjusted          | 1.44 (0.59, 3.51) | 0.41 (0.12, 1.36)      | 1.06 (0.42, 2.63)      | 1.0 (ref)       | 0.754 | 0.91 (0.65, 1.28) |
| Multivariate Adjusted       | 1.50 (0.60, 3.71) | 0.43 (0.13, 1.43)      | 1.20 (0.47, 3.06)      | 1.0 (ref)       | 0.728 | 0.91 (0.65, 1.27) |
| Multivariate Adjusted + BMD | 1.31 (0.52, 3.32) | 0.39 (0.12, 1.31)      | 1.15 (0.45, 2.96)      | 1.0 (ref)       | 0.956 | 0.95 (0.67, 1.34) |
| <b>BioT</b>                 | < 165.4<br>ng/dl  | ≥165.4—<201.5<br>ng/dl | ≥201.5—<241.9<br>ng/dl | ≥ 241.9 ng/dl   |       | SD=64.81          |
| N with outcome              | 13 (6.4) in 202   | 7 (3.2) in 219         | 10 (4.3) in 234        | 6 (2.5) in 245  |       |                   |
| Minimally Adjusted          | 2.35 (0.85, 6.51) | 1.36 (0.44, 4.21)      | 1.64 (0.57, 4.66)      | 1.0 (ref)       | 0.135 | 0.73 (0.51, 1.06) |
| Multivariate Adjusted       | 2.47 (0.84, 7.28) | 1.42 (0.45, 4.48)      | 1.65 (0.57, 4.75)      | 1.0 (ref)       | 0.132 | 0.72 (0.49, 1.05) |
| Multivariate Adjusted + BMD | 2.58 (0.87, 7.66) | 1.50 (0.47, 4.75)      | 1.71 (0.59, 4.96)      | 1.0 (ref)       | 0.117 | 0.71 (0.49, 1.04) |
